# Supplementary material for: Luminescence properties and Judd–Ofelt analysis of Tb3+ doped Sr2YTaO6 double perovskite phosphors for white LED applications
Source: Royal Society of Chemistry journal article supplement (doi:10.1039/d4dt00302k), 2024-01-01
Supplement: d4dt00302k2.pdf [file d4dt00302k2.pdf]

# Luminescence Properties and Judd-Ofelt Analysis of Tb<sup>3+</sup> Doped Sr<sub>2</sub>YTaO<sub>6</sub> Double Perovskite Phosphors for White LED Applications

Li Wang<sup>1,2</sup>, Yuhang Zhang<sup>1,\*</sup>, Duan Gao<sup>1</sup>, Xuezhu Sha<sup>1</sup>, Xin Chen<sup>1</sup>, Yanqiu Zhang<sup>1</sup>, Jinsu Zhang<sup>1</sup>, Xizhen Zhang<sup>1</sup>, Yongze Cao<sup>1</sup>, Yichao Wang<sup>1</sup>, Xiangping Li<sup>1</sup>, Sai Xu<sup>1</sup>, Hongquan Yu<sup>1</sup>, Baojiu Chen<sup>1,\*</sup>

1 School of Science, Dalian Maritime University, Dalian, 116026, Liaoning, PR China

2 College of Medical Laboratory, Dalian Medical University, Dalian, 116044, Liaoning, PR China

## Support Information

### 1. J-O calculation process based on emission spectra and radiative transition lifetime

The relative integrated PL intensity for <sup>5</sup>D<sub>4</sub>→<sup>7</sup>F<sub>J</sub> of Tb<sup>3+</sup> ions can be firstly calculated from the PL spectrum of SYT: 5 mol% Tb<sup>3+</sup> phosphor. Meanwhile, the sum of relative integrated PL intensity

of <sup>5</sup>D<sub>4</sub> energy level of Tb<sup>3+</sup> ions ( $I = \sum_{J=0-6} I_{7F_J}$ ) is usually proportional to the total radiative transition rate  $\sum_{J=0-6} A_{7F_J}$  [1] [2], and the relationship can be represented as follows:

$$I = a \sum_{J=0-6} A_{7F_J} \quad (S1)$$

where  $\sum_{J=0-6} A_{7F_J}$  is equal to the reciprocal of the radiative transition lifetime  $\tau_0$ , and the expression is written as

$$\sum_{J=0-6} A_{7F_J} = \frac{1}{\tau_0} \quad (S2)$$

---

\* Corresponding Authors: YHZhang email: [yuhangzhang@dlmu.edu.cn](mailto:yuhangzhang@dlmu.edu.cn); BJChen email: [bjchen@dlmu.edu.cn](mailto:bjchen@dlmu.edu.cn)  
Fax and Tel.: 86-411-8472-8909

According to the above analysis, substitute  $\tau_0 = 3.63$  ms into Eq. (S2) and combine it with Eq. (S1), the coefficient  $a$  can be confirmed as  $9.74 \times 10^{-4}$ . And then, the radiative transition rate from  ${}^5D_4$  to  ${}^7F_J$  were gotten by using Eq. (S3).

$$I_{7F_J} = a \times A_{7F_J} \quad (S3)$$

Furthermore, the radiative transition rates for a certain transition from state J to state J' can be expressed as

$$A_{J-J'}^{md} = \frac{64\pi^4 \nu^3}{3h(2J+1)} n^3 \left( \frac{eh}{4\pi m_e c} \right)^2 \langle \Psi_J || L + 2S || \Psi'_{J'} \rangle^2 \quad (S4)$$

$$A_{J-J'}^{ed} = \frac{64\pi^4 e^2 \nu^3}{3h(2J+1)} \frac{n(n^2+2)^2}{9} \sum_{\lambda=2,4,6} \Omega_\lambda \langle \Psi_J || U^{(\lambda)} || \Psi'_{J'} \rangle^2 \quad (S5)$$

where  $A^{md}$  and  $A^{ed}$  are the contribution from magnetic dipole (MD) to the transition rate and the contribution from electric dipole (ED), respectively.  $\nu$  is the central wavenumber for J→J' transition.  $h$  is Planck's constant ( $h = 6.626 \times 10^{-27}$  erg·s),  $2J+1$  is the degeneracy of the initial state,  $n$  is the refractive index of the host (here  $n$  is 1.98 for SYT host), and  $\langle \Psi_J || L + 2S || \Psi'_{J'} \rangle^2$  is the squared matrix element for MD line strength.[3]  $e$  is the charge of an electron ( $e = 4.80 \times 10^{-10}$  esu) and  $\langle \Psi_J || U^{(\lambda)} || \Psi'_{J'} \rangle$  is the reduced matrix element for the J→J' transition.[3] Based on the above analysis, by applying the least squares method to the equations corresponding to all the transitions from  ${}^5D_4$  to  ${}^7F_J$ , the parameters  $\Omega_\lambda$  ( $\lambda = 2, 4, 6$ ) were calculated.

Additionally, the fluorescence branch ratios for the  ${}^5D_4$  energy level under 318 nm excitation can be derived from the following equation:

$$\beta = \frac{A_{J-J'}}{\sum_{J=0-6} A_{J-J'}} \quad (S6)$$

[1] Tian, B.; Chen, B.; Tian, Y.; Li, X.; Zhang, J.; Sun, J., et al., Excitation pathway and temperature dependent luminescence in color tunable  $Ba_5Gd_8Zn_4O_{21}:Eu^{3+}$  phosphors. *J Mater Chem C* **2013**, *1* (12), 2338.

[2] Tian, Y.; Chen, B.; Hua, R.; Sun, J.; Cheng, L.; Zhong, H., et al., Optical transition, electron-phonon coupling and fluorescent quenching of  $La_2(MoO_4)_3:Eu^{3+}$  phosphor. *J Appl Phys* **2011**, *109* (5), 053511.

[3] Loiko, P.; Mateos, X.; Dunina, E.; Kornienko, A.; Volokitina, A.; Vilejshnikova, E., et al., Judd-Ofelt modelling and stimulated-emission cross-sections for  $Tb^{3+}$  ions in monoclinic  $KYb(WO_4)_2$  crystal.

*J Lumin* **2017**, *190*, 37-44.

## 2. Calculation for CCT and CRI

Based on the obtained color coordinates, the CCT value can be calculated by using the McCamy's approximate[1]

$$CCT = -437n^3 + 3601n^2 - 6861n + 5514.31 \quad (S7)$$

where  $n = \frac{x - x_e}{y - y_e}$ ,  $(x, y)$  is the chromaticity coordinates.  $(x_e, y_e)$  is the coordinate of the epicenter and its value is (0.332, 0.186).

Moreover, general color rendering index (CRI) is the average of eight special color rendering indices.[2]

$$CRI = \frac{1}{8} \sum_{i=1}^8 R_i = \frac{1}{8} \sum_{i=1}^8 (100 - 4.6\Delta E_i) \quad (S8)$$

where  $R_i$  is the special color rendering index of a certain color sample  $i$ ,  $\Delta E_i$  is the corresponding color difference between the sample under the reference light source and the test light source.

[1] McCamy, C. S., Correlated color temperature as an explicit function of chromaticity coordinates. *Color Res Appl* **1992**, *17* (2), 142-144.

[2] Jin, X.; Xie, Y.; Tang, R.; Geng, X.; Che, J.; Lou, L., et al., Novel double perovskite  $\text{Sr}_3\text{WO}_6:\text{Sm}^{3+}, \text{Na}^+$  orange-red emitting phosphors with high thermal stability for white LEDs. *J Alloy Compd* **2022**, *899*, 162739.
